# Supplementary material for: Effect of Mn doping on the electron injection in CdSe/TiO2 quantum dot sensitized solar cells
Source: Royal Society of Chemistry journal article supplement (doi:10.1039/d0cp03866k), 2020-12-10
Supplement: d0cp03866k1.pdf [file d0cp03866k1.pdf]

## Supplementary Information For

### “Effect of Mn dopant on the electron injection in CdSe/TiO<sub>2</sub> quantum dot sensitized solar cells”

Ning Du<sup>a</sup>, Yingqi Cui,<sup>b</sup> Li Zhang<sup>\*a</sup> and Mingli Yang<sup>\*ac</sup>

<sup>a</sup> Institute of Atomic and Molecular Physics, Sichuan University, Chengdu 610065, China

<sup>b</sup> School of Physics and Electronic Engineering, Zhengzhou Normal University, Zhengzhou 450044, China

<sup>c</sup> Research Center for Materials Genome Engineering, Sichuan University, Chengdu 610065, China

---

\* E-mail: myang@scu.edu.cn and lizhang@scu.edu.cn

## The applicability of Marcus-Levich-Dogonadze expression

The Marcus-Levich-Dogonadze expression employed in present work is based on semiclassical Marcus theory, in which the electron transition is treated with a quantum method and the nuclear motion as a classical method. The nuclear relaxation following the electron transfer involves mostly intra-molecular (high-frequency) modes.<sup>1</sup> The Marcus-Levich-Jortner equation is then derived to consider the effect of the quantum vibrational modes in an effective way of

$$k = \frac{2\pi}{\hbar} |V|^2 \frac{1}{\sqrt{4\pi\lambda_{\text{ext}}k_B T}} \sum_{\nu} \exp(-S_{\text{eff}}) \frac{(S_{\text{eff}})^{\nu}}{\nu!} \exp\left(-\frac{(\lambda_{\text{ext}} + \nu\hbar\omega_{\text{eff}} + \Delta G)^2}{4\pi\lambda_{\text{ext}}k_B T}\right) \quad (1)$$

where  $\lambda_{\text{ext}}$  is the external reorganization energy,  $S_{\text{eff}}$  is the effective Huang-Rhys factor, and  $\omega_{\text{eff}}$  is the frequency of one effective mode that incorporates in an average way the effect of all quantum modes.<sup>1</sup> The internal reorganization energy  $\lambda_{\text{int}}$  does not enter explicitly in Eq. (1), but it is inferred as the sum of contribution from each mode  $i$  as follows:

$$\lambda_{\text{int}} = \sum_i S_i \hbar \omega_i \quad (2)$$

$S_i$  is the Huang-Rhys factor of the corresponding frequency mode (with frequency  $\omega_i$ , the summation of  $i$  runs over all vibronic modes).  $\lambda_{\text{int}}$  is involved in  $S_{\text{eff}}$  by

$$S_{\text{eff}} = \frac{\lambda_{\text{int}}}{\hbar\omega_{\text{eff}}} \quad (3)$$

To evaluate how the internal reorganization energy is distributed along the various normal modes of the QD (the reorganization energies of TiO<sub>2</sub> substrate are small and ignorable), we computed the individual components of the reorganization energy (to see Eq. 2). Fig. S1 presents the  $S_i \hbar \omega_i$  and  $S_i$  values at corresponding  $\hbar \omega_i$ . It is worth noting that the  $\lambda_{\text{int}}$  (0.081 eV) calculated by canonical mode is not exactly equal to  $\lambda_{\text{QD}}$  (0.073 eV) calculated by potential energy surface because the harmonic potential is only an approximation to the actual potential surface. Compared with organic molecule, the vibrational frequencies of QD are much small (within 250 cm<sup>-1</sup>) due to the heavy elements Cd and Se in the studied structures. The vibrational frequency of 99 cm<sup>-1</sup> is the main and strongest quantum mode contributing to  $\lambda_{\text{int}}$ , so the effective frequency  $\omega_{\text{eff}}$  is set to be 99 cm<sup>-1</sup> and the corresponding  $S_{\text{eff}}$  is 6.6, which satisfies the high temperature approximation [ $k_B T \geq \hbar \omega_{\text{eff}}$  (T=300K)] of semiclassical Marcus theory.<sup>2,3</sup>

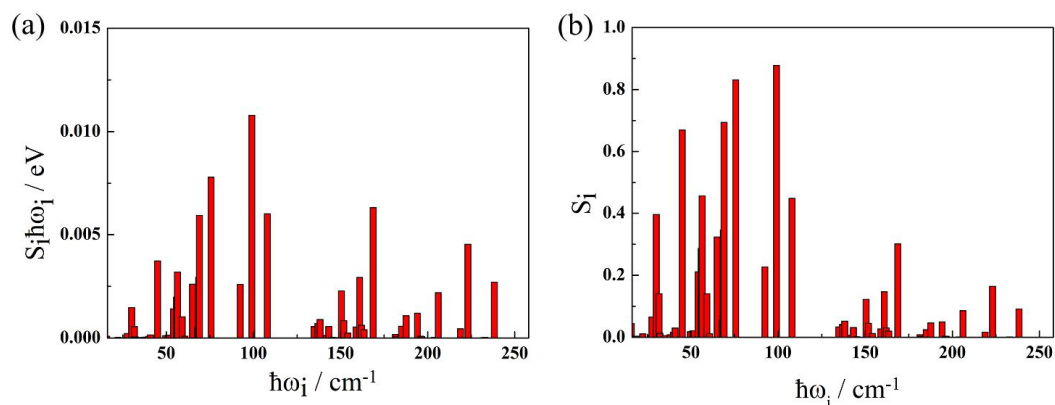

**Fig. S1** Distribution of  $S_i \hbar\omega_i$  (a) and  $S_i$  (b) at different vibrionic modes  $\hbar\omega_i$  in  $(\text{CdSe})_{13}$ .

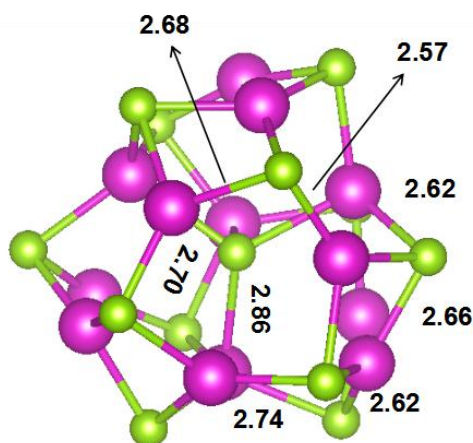

**Fig. S2** Selected Cd–Se bond-lengths in  $(\text{CdSe})_{13}$  cluster.

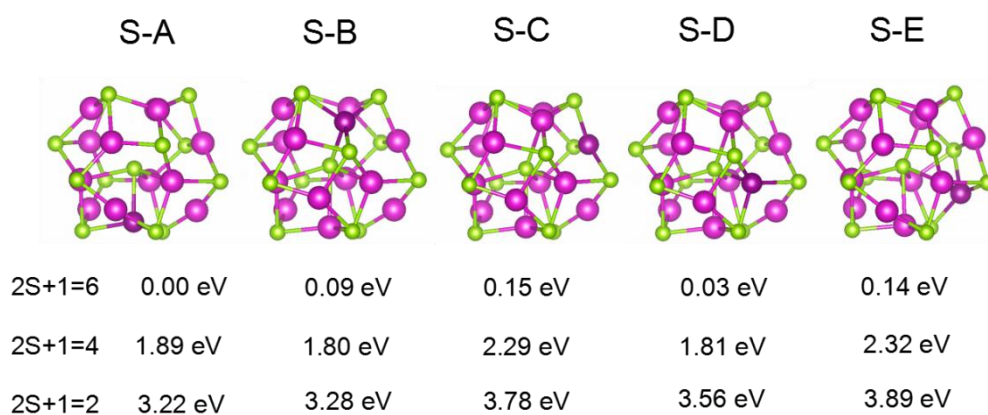

**Fig. S3** Structures and energetics of selected low-lying isomers

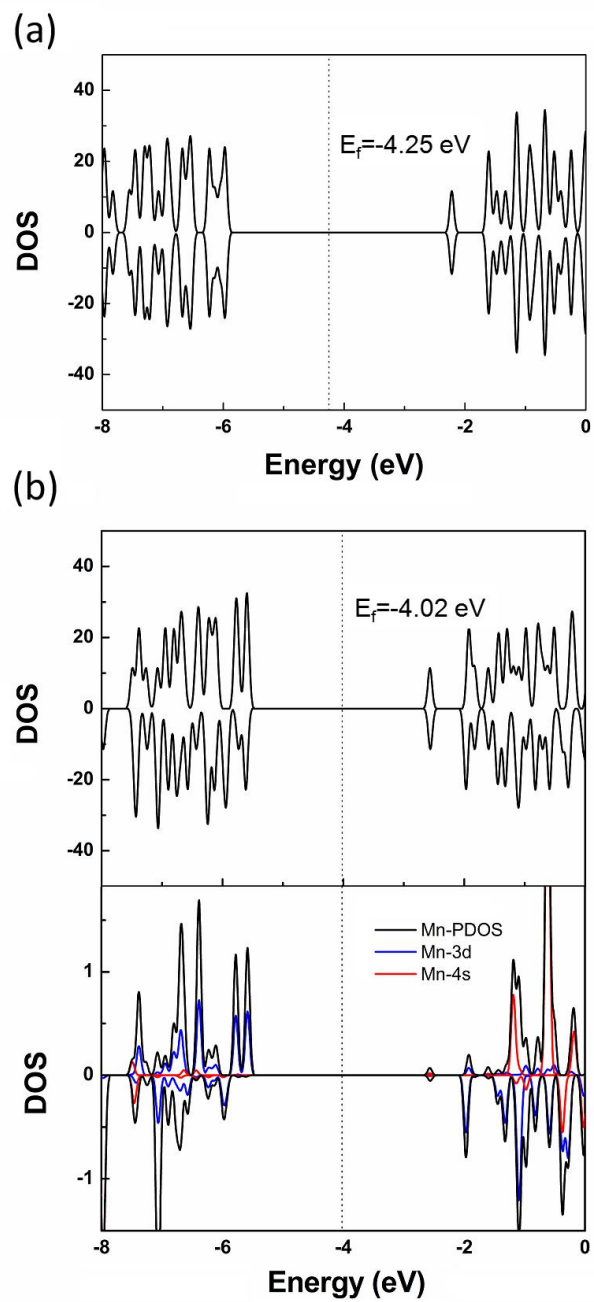

**Fig. S4** Total DOS for  $(\text{CdSe})_{13}$  (a) and  $\text{Cd}_{12}\text{MnSe}_{13}$  [top of (b)] clusters. PDOS of Mn is presented in the bottom of (b).

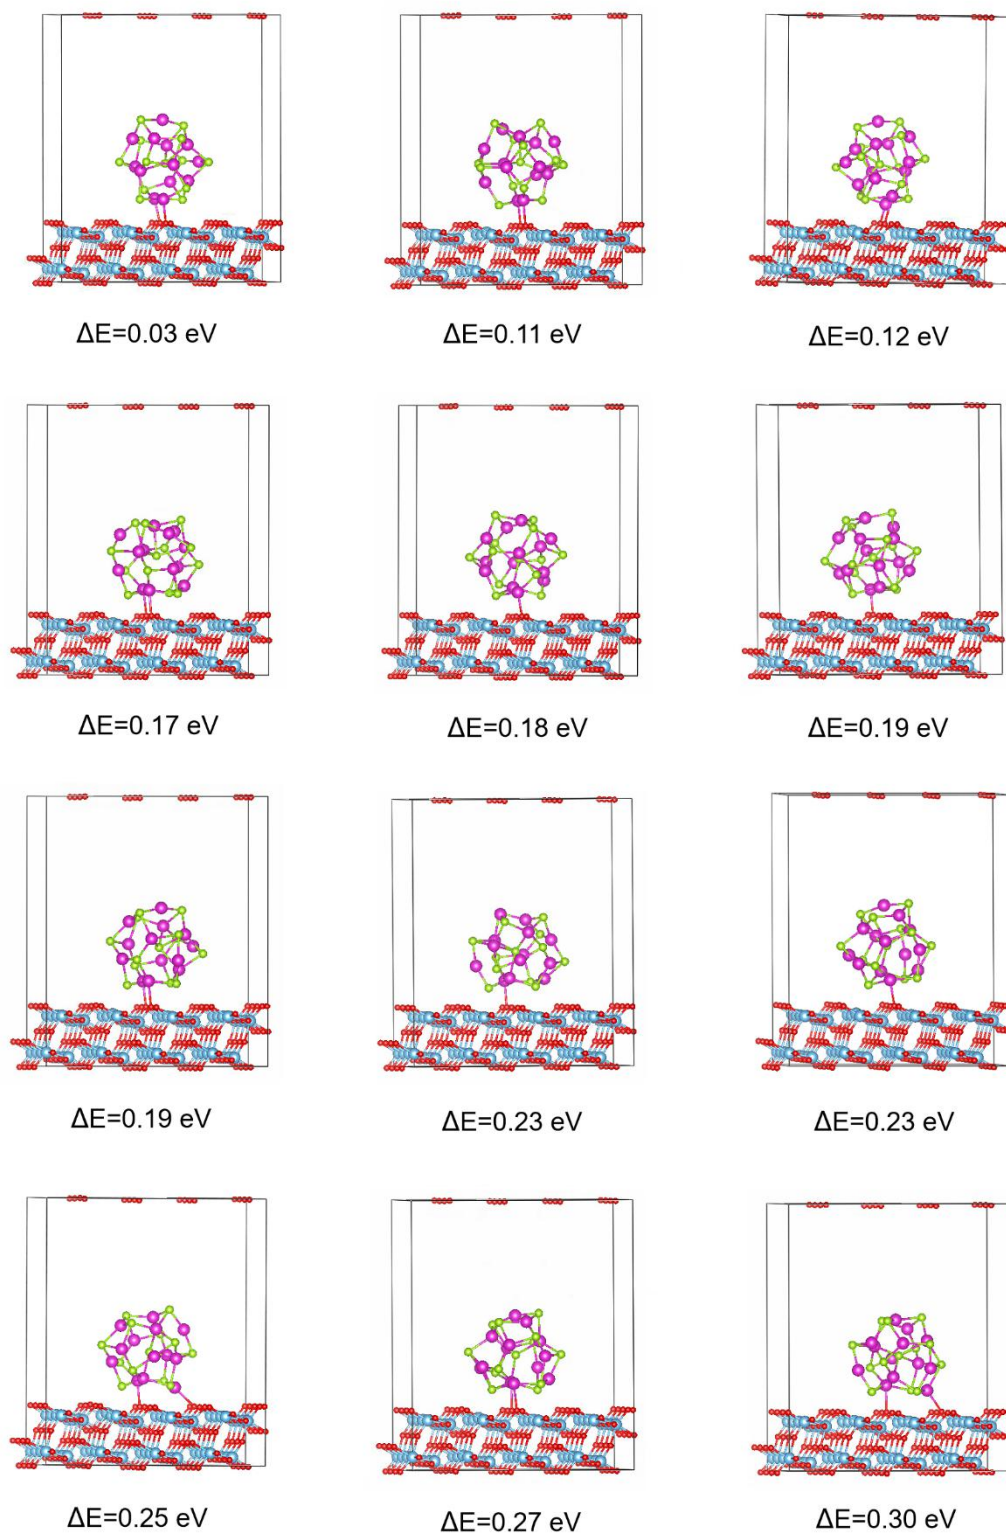

**Fig. S5** Selected low-lying structures and its relative energy to the lowest energy structure.

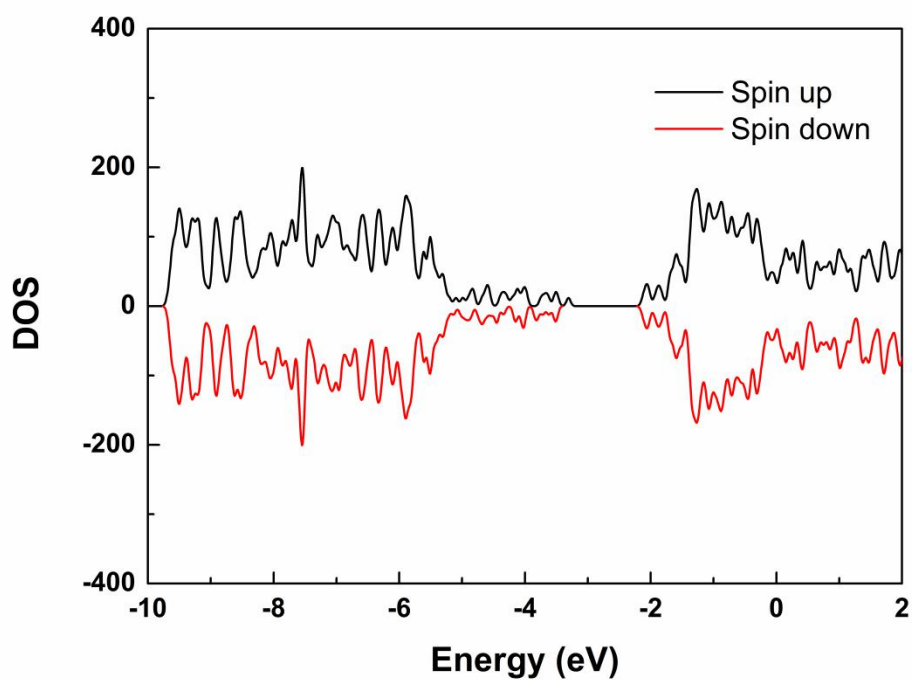

**Fig. S6** The spin up and spin down DOS of Cd<sub>12</sub>MnSe<sub>13</sub>@TiO<sub>2</sub>

### References

1. T. Liu and A. Troisi, *J. Phys. Chem. C*, 2011, **115**, 2406-2415.
2. T. Unger, S. Wedler, F.-J. Kahle, U. Scherf, H. Bässler and A. Köhler, *J. Phys. Chem. C*, 2017, **121**, 22739-22752.
3. E. Lee, E. S. Medvedev and A. A. Stuchebrukhov, *J. Chem. Phys.*, 2000, **112**, 9015-9024.
